# Supplementary material
Source: publisher figshare collection journal article supplement (https://acs.figshare.com/ndownloader/files/5409041)
Supplement: Supplementary file 1 [file 5409041]

# 1 Namespaces

Table 1: Namespaces and their prefixes used in the ontology.

| Namespace prefix | Namespace                                   |
|------------------|---------------------------------------------|
| bo               | http://www.bacillondex.org#                 |
| so               | http://purl.org/obo/owl/SO#                 |
| go               | http://purl.org/obo/owl/GO#                 |
| sbol             | http://sbols.org/sbol.owl#                  |
| bods             | http://www.bacillondex.org/cv#              |
| boet             | http://www.bacillondex.org/evidenceType#    |
| owl              | http://www.w3.org/2002/07/owl#              |
| rdf              | http://www.w3.org/1999/02/22-rdf-syntax-ns# |
| rdfs             | http://www.w3.org/2000/01/rdf-schema#       |
| xsd              | http://www.w3.org/2001/XMLSchema#           |

# 2 Class Definitions

```
Class: NegativelyRegulatedOperator
  Annotations:
    rdfs:label "Negatively regulated operator",
    rdfs:comment "Operator site for a repressor"
  EquivalentTo:
    Operator
      and (NA some rdf:PlainLiteral)
      and (regulationType value "Negative")
  SubClassOf:
    Operator

Class: PositivelyRegulatedOperator
  Annotations:
    rdfs:label "Positively regulated operator",
    rdfs:comment "Operator site for an activator"
  EquivalentTo:
    Operator
      and (NA some rdf:PlainLiteral)
      and (regulationType value "Positive")
  SubClassOf:
    Operator
```

Figure 1: The class definitions for operator classification in the Manchester OWL syntax. Operators with known sequences are classified according to their regulation type restrictions.

```

Class: InduciblePromoter
Annotations:
  rdfs:label "Inducible promoter",
  rdfs:comment "Promoter with an activator site"
EquivalentTo:
  Promoter
    and (hasPart exactly 1 Operator)
    and (hasPart exactly 1 PositivelyRegulatedOperator)
SubClassOf:
  Promoter

```

Figure 2: The inducible promoter class definition. Promoters with one operator for an activator are classified as InduciblePromoters.

```

Class: RepressiblePromoter
Annotations:
  rdfs:label "Repressible promoter",
  rdfs:comment "Promoter with a repressor site"
EquivalentTo:
  Promoter
    and (hasPart exactly 1 NegativelyRegulatedOperator)
    and (hasPart exactly 1 Operator)
SubClassOf:
  Promoter

```

Figure 3: The repressible promoter class definition. Promoters with one operator for a repressor are classified as RepressiblePromoters.

```

Promoter
  and (hasPart exactly 2 Operator)
  and (hasPart exactly 2 PositivelyRegulatedOperator)

```

Figure 4: The OWL expression for the InduciblePromoterWith2Operators class which is used to classify promoters with two activator sites only.

```

Promoter
  and (hasPart exactly 2 Operator)
  and (hasPart exactly 2 NegativelyRegulatedOperator)

```

Figure 5: The OWL expression for the RepressiblePromoterWith2Operators class which is used to classify promoters with two repressor sites only.

```

Promoter
  and (hasPart exactly 2 Operator)
  and (hasPart exactly 1 NegativelyRegulatedOperator)
  and (hasPart exactly 1 PositivelyRegulatedOperator)

```

Figure 6: The OWL expression to classify promoters with one activator and one repressor site.

```

Class: ANDGatePromoter
  SubClassOf:
    InduciblePromoterWith2Operators

Class: ORGatePromoter
  SubClassOf:
    InduciblePromoterWith2Operators

Class: NORGatePromoter
  SubClassOf:
    RepressiblePromoterWith2Operators

Class: NANDGatePromoter
  SubClassOf:
    RepressiblePromoterWith2Operators

Class: ANDNGatePromoter
  SubClassOf:
    RepressibleInduciblePromoterWith2Operators

```

Figure 7: Two-input logic gate promoter definitions.

```

Class: ConstitutivePromoter
  Annotations:
    rdfs:comment "Constitutive Promoter",
    rdfs:label "Constitutive Promoter"
  SubClassOf:
    Promoter

Class: ConstitutiveSigAPromoter
  Annotations:
    rdfs:comment "Constitutive SigA Promoter",
    rdfs:label "Constitutive SigA Promoter"
  EquivalentTo:
    SigAPromoter
    and (not (hasPart some Operator))
  SubClassOf:
    SigAPromoter,
    ConstitutivePromoter

```

Figure 8: Constitutive promoter definitions in SyBiOnt. Constitutive SigA promoters are SigA promoters that do not include any operator binding sites.

```

CDS and
  (encodes some (Protein and
    (bindsTo some PositivelyRegulatedOperator)))

```

Figure 9: The OWL expression for the `ActivatorEncodingCDS` defined class. A CDS that encodes for a protein binding to at least one activator site is classified as `ActivatorEncodingCDS`.

```
CDS and
  (encodes some (Protein and
    (bindsTo some NegativelyRegulatedOperator)))
```

Figure 10: The OWL expression for the `RepressorEncodingCDS` defined class. A CDS that encodes for a protein binding to at least one repressor site is classified as `RepressorEncodingCDS`.

```
CDS and (encodes some (Protein
  and (hasFunction some go:G0_0000155)))
```

Figure 11: The OWL expression for the `KinaseEncodingCDS` defined class. A CDS that encodes for a protein that has function `go:G0_0000155` is classified as `KinaseEncodingCDS`.

```
CDS and (encodes some (Protein
  and (hasFunction some go:G0_0000156)))
```

Figure 12: The OWL expression for the `ResponseRegulatorEncodingCDS` defined class. A CDS that encodes for a protein that has function `go:G0_0000156` is classified as `ResponseRegulatorEncodingCDS`.
